# Supplementary material for: Excitation induced efficient luminescent properties of nanocrystalline Tb3+/Sm3+:Ca2Gd8Si6O26 phosphors
Source: Royal Society of Chemistry journal article supplement (doi:10.1039/c0jm04337k), 2011-01-01
Supplement: c0jm04337k.pdf [file c0jm04337k.pdf]

## Synthesis procedure

Tb<sup>3+</sup> /Sm<sup>3+</sup> activated CGS nanophosphors were prepared by solvothermal process with the composition Ca<sub>2</sub>Gd<sub>8-x-y</sub>Tb<sub>x(=1)</sub>Sm<sub>y(=0 to 2)</sub>Si<sub>6</sub>O<sub>26</sub>. The stoichiometric amounts of high purity grade calcium nitrate tetrahydrate (Ca(NO<sub>3</sub>)<sub>2</sub>·4H<sub>2</sub>O), gadolinium nitrate hexahydrate (Gd(NO<sub>3</sub>)<sub>3</sub>·6H<sub>2</sub>O), terbium nitrate pentahydrate (Tb(NO<sub>3</sub>)<sub>3</sub>·5H<sub>2</sub>O), Samarium nitrate hexahydrate (Sm(NO<sub>3</sub>)<sub>3</sub>·6H<sub>2</sub>O) and tetraethyl orthosilicate (Si(OC<sub>2</sub>H<sub>5</sub>)<sub>4</sub>) were dissolved in 40 ml of 2-propanol. All reagents were taken without any further purification and stirred vigorously by using the magnetic stirrer until the formation of homogeneous solution and was transferred into a stainless steel autoclave with a Teflon liner (80ml capacity and 50 % filling). It was then heated to 230 °C at a rate of 2 °C/min and maintained for 5h with magnetic stirring (at 180 rpm) to make stable networks between the reactants. After gradually cooling down to room temperature, the precipitate was separated by a centrifugal separator with 3000 rpm for 3 min and then dried at 50 °C for a day in the ambient atmosphere. The dried powder was sintered at 1200 °C for 5h and was brought to room temperature.
